# Supplementary material for: Enhanced CO2 capture for photosynthetic lycopene production in engineered Rhodopseudomonas palustris, a purple nonsulfur bacterium
Source: Royal Society of Chemistry journal article supplement (doi:10.1039/d2gc02467e), 2022-01-01
Supplement: d2gc02467e1.pdf [file d2gc02467e1.pdf]

**Table S1 Primers used for plasmids construction**

| Primers         | Sequences (5'-3')                                                                                                              |
|-----------------|--------------------------------------------------------------------------------------------------------------------------------|
| CrtE-F          | GGGAACAAAAGCTGGGTACCTGCACCTATAGGAAAGAGGAGGAAAACCTAAATGGAC<br>GTGACCAATCGGATCGAGCG                                              |
| CrtE-R          | TTTAAGCTTTCAGTGGTGGTGGTGGTGGTGGGCCGCAGTCGCGGCCAGTTT<br>ACCACCACCACCACCCTGAAAGCTTACTGTTCGAAACGTTAGGAGGGATCTATGAGTC              |
| CrtB-F:         | TGCAATCCGATATGTTGG                                                                                                             |
| CrtB-R          | GAACTAGTGGATCCCCGGGCTGCAGCTACACCCGGCTGCGTT                                                                                     |
| CrtI-F:         | GGGAACAAAAGCTGGGTACCCCTTACTGGAGGTATTTATATGCTCGATCCTGGCCCC                                                                      |
| CrtI-R:         | GCGGTGGCGGCCGCTCTAGAACTAGTTCATGATGTCACCAGACTGTCTG                                                                              |
| CrtI-1-R:       | TACCGTCGACCTCGAGTCAGTGGTGGTGGTGGTGGTGTGATGTCACCAGACTGTCTGGC<br>GGGAACAAAAGCTGGGTACCAAGTTAAAGGGGGTTTTTCATGTGACCGAATTTAGTAAA     |
| Dxs-3-F         | ACACCGCTTCT                                                                                                                    |
| Dxs-3-R         | TACCGTCGACCTCGAGTCAGTGGTGGTGGTGGTGGTGGGCCAGCTTCGAGGTCTCG<br>GGGAACAAAAGCTGGGTACCTACGAAACCAGGAGGTTTCATATGACGGCGGACAACAA<br>CT   |
| IDisc-3-F       | TACCGTCGACCTCGAGTCAGTGGTGGTGGTGGTGGTGGTGCAGCATGCGGTGGATCTGG<br>ACCACTGACTCGAGCAATCAAAAAGGAGGATATCGTGACCGAATTTAGTAAAACACCG<br>C |
| IDisc-3-R       | GGAATTCGATATCAAGCTTTCAGTGGTGGTGGTGGTGGTGGTGGGCCAGCTTCGAGGTCTCG<br>ACCACTGACTCGAGCACACAAAGGAAGGTATTTTATGACGGCGGACAACA<br>ACT    |
| Dxs-1-F         | ATTCGATATCAAGCTTTCAGTGGTGGTGGTGGTGGTGGTGCAGCATGCGGTGGATCTGG<br>CACCCTGAAAGCTTCAATCAAAAAGGAGGATATCGTGACCGAATTTAGTAAAACACC<br>G  |
| Dxs-1-R         | CCCCGGGCTGCAGGAATTCTCAGTGGTGGTGGTGGTGGTGGTGGGCCAGCTTCGAGGTCTCG<br>GTGGATCCCCCGGGCTGCAGTTAGTTTCGATAAGAGCGAACGG                  |
| IDisc-1-F       | TACCGGGCCCCCTCGAGAAGGAGATATACCATGGAGGAGG                                                                                       |
| IDisc-1-R       | CTAGTGGATCCCCGGGTTATAGCATTCTATGAATTTGCCTGTC<br>GAACTAACTGCAGCCCGGAAGAGGTATATATTAATGTATCGATTAAATAAGGAGG                         |
| DXS-2-F         | AATTCGATATCAAGCTTAAAGGAGCGCCACCATGGTGAGCAAG                                                                                    |
| Dxs-2-R         | TGGAAAGCGGGCAGTGATTACTTGTACAGCTCGTCCATGCC                                                                                      |
| pBBR-upperMVA-F | TCACTGCCCCTTTCCAGT                                                                                                             |
| pBBR-upperMVA-R | AAGCTTGATATCGAATTCCTGCAGC                                                                                                      |
| pBBR-wholeMVA-F | CTCACTATAGGGCGAATTGGAGC                                                                                                        |
| pBBR-wholeMVA-R | TCGTATTACGCGCTCA                                                                                                               |
| EGFP-F          | TGAGCGCGCGTAATACGAACCGTCTCCCCCTTTGAACGA                                                                                        |
| EGFP-R          | ATTCGCCCTATAGTGAGGATGACTCCCCACAACGCAG                                                                                          |
| pBBR-vector-F   | TGAGCGCGCGTAATACGAATATCTCGGCGCCACAC                                                                                            |
| pBBR-vector-R   | CAATTCGCCCTATAGTGAGCCAATTTCTCCTCGCTGCAG                                                                                        |
| Vector-F        | TGAGCGCGCGTAATACGATGTCGCCGGATGGAGGC                                                                                            |
| Vector-R        | CAATTCGCCCTATAGTGAGGTCGTCCTCCTTGAAAGC                                                                                          |
| Primer-PcbbF-F  | TGAGCGCGCGTAATACGACCGCGACGCAGGTCGGCA                                                                                           |
| Primer-PcbbF-R  | CAATTCGCCCTATAGTGAGCCGTTTTCTCACTCCGGCTCAGCT                                                                                    |
| Primer-PcbbG-F  | TGAGCGCGCGTAATACGAGGGTGTCTCCAGGCGTG                                                                                            |
| Primer-PcbbG-R  |                                                                                                                                |
| Primer-PcbbL-F  |                                                                                                                                |
| Primer-PcbbL-R  |                                                                                                                                |
| Primer-PcrtD-F  |                                                                                                                                |
| Primer-PcrtD-R  |                                                                                                                                |
| Primer-PcrtE-F  |                                                                                                                                |

---

|                |                                               |
|----------------|-----------------------------------------------|
| Primer-PcrtE-R | CAATTCGCCCTATAGTGAGGGCCACACTCCCGCGCTTC        |
| Primer-Ptrc-F  | GAGCGCGCGTAATACGAGCGCCGACATCATAACGGTT         |
| Primer-Ptrc-R  | CAATTCGCCCTATAGTGAGATTCCGGTCGAGTGCCCA         |
| Primer-PnifH-F | GCGCGCGTAATACGATTCTCCCAACCTCAATGATCATCATG     |
| Primer-PnifH-R | CAATTCGCCCTATAGTGAGCTCTCCGTTGACCTAATGCCG      |
| Primer-PpckA-F | TGAGCGCGCGTAATACGAGATCTGACCGGCGCAGAG          |
| Primer-PpckA-R | CAATTCGCCCTATAGTGAGGAATAGATCCTCCTCGAATCCGCG   |
| WholeMVA-PCR-F | CCTGTCGTGCCAGCTGCATTAATG                      |
| WholeMVA-PCR-R | TTTCACACAGGAAACAGCTATGACCATGATTAC             |
| PpckA-F        | GCTGTTTCCTGTGTGAAAGAATAGATCCTCCTCGAATCCGCG    |
| PpckA-R        | GCAGCTGGCACGACAGGGATCTGACCGGCGCAGAGG          |
| PcbbG-F        | GCTGTTTCCTGTGTGAAACCAATTTCTCCTCGCTGCAGATG     |
| PcbbG-R        | GCAGCTGGCACGACAGGATATCTCGGCGCCCACACTC         |
| PMG103-MVAzp-F | CTCTAGAGTCGACGGTACCATGATGCAGAACGAAGAAGCGGAAGC |
| PMG103-MVAzp-R | TTGCATGCCTGCAGGTCGACTCAACGCCCTCGAACGGCG       |
| PMG103-SacII-F | GTCGACCTGCAGGCATGC                            |
| PMG103-SacII-R | ATGGTACCGTCGACTCTAGAGGATC                     |

---

Underlined letters, the restriction sites

Bold letters, the RBS sequence

**Table S2 Codon-optimized gene sequence**

| Gene name               | Sequence (5'-3')                                                                                                                                                                                                                                                                                                                                                                                                                                                                                                                                                                                                                                                                                                                                                                                                                                                                                                                                                                                 |
|-------------------------|--------------------------------------------------------------------------------------------------------------------------------------------------------------------------------------------------------------------------------------------------------------------------------------------------------------------------------------------------------------------------------------------------------------------------------------------------------------------------------------------------------------------------------------------------------------------------------------------------------------------------------------------------------------------------------------------------------------------------------------------------------------------------------------------------------------------------------------------------------------------------------------------------------------------------------------------------------------------------------------------------|
| <i>IDI<sub>sc</sub></i> | ATGACGGCGGACAACAACCTCGATGCCGCACGGCGCGGTGTCGTTCGTAC<br>GCGAAGCTGGTCCAGAACCAGACCCCGGAGGACATCCTGGAGGAGTTC<br>CCGGAGATCATCCCGCTCCAGCAGCGCCCGAACACGCGGTTCGTTCGGAG<br>ACCAGCAACGACGAGTCGGGGCAGACGTGCTTCTCCGGCCACGACGAG<br>GAGCAGATCAAGCTGATGAACGAGAACTGCATCGTGCTGGACTGGGAC<br>GACAACGCCATCGGCGCCGGCACCAAGAAGGTCTGCCACCTGATGGAG<br>AACATCGAGAAGGGCCTCCTGCACCGCGCCTTCTCCGTCTTCATCTTCA<br>ACGAGCAGGGCGAATTACTCCTGCAGCAGCGGGCCACCGAGAAGATCA<br>CCTTCCCGGACCTGTGGACCAACACGTGCTGCTCGCACCCGCTGTGCAT<br>CGACGACGAACTAGGCCTGAAGGGCAAGCTCGACGACAAGATCAAGG<br>GCGCGATCACGGCCGCGGTGCGCAAGCTGGACCACGAGCTAGGCATCC<br>CGGAGGACGAGACCAAGACGCGGGGCAAGTTCCACTTCTCAACCGCA<br>TCCACTACATGGCCCCGTCCAACGAGCCGTGGGGCGAGCACGAGATCG<br>ACTACATCCTGTTCTACAAGATCAACGCGAAGGAGAACCTCACGGTGA<br>ACCCGAACGTGAACGAGGTCCGGGACTTCAAGTGGGTGAGCCCGAACG<br>ACCTGAAGACCATGTTCCGCCACCCGTCCTACAAGTTCACGCCGTGGTT<br>CAAGATCATCTGCGAGAACTACCTCTTCAACTGGTGGGAGCAGCTGGA<br>CGACCTCTCGGAGGTGGAGAACGACCGCCAGATCCACCGCATGCTGCA<br>CCACCACCACCACCACTGA |

**Table S3 Sequence of promoters tested**

| Promoter name           | Sequence (5'-3')                                                                                                                                                                                                                                                                                                                                                                                                                                                                                                                                                                                                                                                                                                                                                                                                                                                                                                                                                                                                                        |
|-------------------------|-----------------------------------------------------------------------------------------------------------------------------------------------------------------------------------------------------------------------------------------------------------------------------------------------------------------------------------------------------------------------------------------------------------------------------------------------------------------------------------------------------------------------------------------------------------------------------------------------------------------------------------------------------------------------------------------------------------------------------------------------------------------------------------------------------------------------------------------------------------------------------------------------------------------------------------------------------------------------------------------------------------------------------------------|
| <i>P<sub>cbbF</sub></i> | ACCGTCTCCCCCTTTGAACGACGGCGGCCGTCGCGAGCATC<br>GCTCCGGTCGCTCAACCATCTGTTTTGGTTCAGTTTTCTATGT<br>CCAAAAATGCGACGGAAGCTCAAGGGACGTCGCGCTGCAGC<br>ATCTTGGCTCGCCTCGGCAGCGGCAAAGACCCGCAGGGTGTGG<br>ATACGCGGCGCTGCTAAAGTATAAGAGTGTCGACTCTCCGACC<br>GATCGGGGCCAAATCACCCCGATCTGGGGCCGTGTCTTCTGAT<br>CTAAATCACGGCGGTCTTCGACTAATTGTGCAGAATGCGCGCC<br>GCGCCGCGTTTTCCGGTAAAAAATACAGGGCAGCGGCGCTT<br>CATATAAAAATTCCTTTGGTGGTACCAAGGAAAATGCAATTC<br>TCTTATGTGACCGATCGGCTCACAAGCTCCGCGCAACGGAGCT<br>CGCGGAACCATTTGGTTCGCGCTGCGTTGTGGGGGAGTCATC<br>ATATCTCGGCGCCCACTCGGGCGATTAAGGATCGCGCAGTT<br>TTTCAGGCGCGGCGGTTACCGCATCAGGTGGGCCGCGCCTGC<br>GGTAAGTCTTTGATCTGAATCATGAACGAGCGGATTGCAACTG<br><i>P<sub>cbbG</sub></i>                                                                                                                                                                                                                                                                                                                                          |
| <i>P<sub>cbbL</sub></i> | CTCGGCATTTTGGGCATGAAACCGCGCAAGAGTACGGGGCGGG<br>CTCCGCCATAGAACTGAAAATCATCTGCAGCGAGGAGAAATTG<br>G<br>TGTCGCCGGATGGAGGCCGCTGCGCGCCTCACAGGGATATCC<br>ACGACGCGTTTGCGGCGCTGCATGCCGCGCTCGACAATGCCGA<br>ACCGGTGCTCGACGCCCCGCACGAGCTGACCTGATCGCGCCTG<br>CCGCGATATAAGAAATACTTTTGCATATCGAAGATAATAAAA<br>TTTCTCTATTTTCGGCGTTGTGGTCAAAGTCTCCCGCACGCA<br>TCCCGCGACGCTGATCGGCATAGCGGAACTTCGCGACCGAGT<br>TCCCGAACGGCGTCGACCATCCAGCCGCTCGGCCGGCCAGGG<br>CTTTCAAGGAGGACGAC<br>CCGCGACGCAGGTCGGCACCATCGAAGCACGGAAGATCGTCA<br>TGGATCAGCGAGGCACAGTGCATCAGCTCAAGTGCGGCACCGG<br>CAGCTTCGGTAATTCGGGATTGTCTTCGCCGCAAGCAAGCGC<br>CACGCTGTGGCAGAGCCGCGGACGAACGCGCGCCCCGCGCGG<br>GAACACCGCACTGCGCATTGCTGCCGCCAGCCGCGGCGGACAT<br>CCGGCCATGTCGGCCTGATTGAGCGCTTCTGTCAGAGCACGCT<br>CGATCCGATTGGTCACGTCCATGGCCACACTCCCGCGCTTACG<br>GCACAAGTGTCAGTTTAACTTGTCATGCCAAACTGTAAGTTATT<br>GTGGACACCTGTCAATGATATGGCTCAAAGACAGCTGAGCCGG<br>AGTGAGAAAACGG<br>GCGCCGACATCATAACGGTTCTGGCAAATATTCTGAAATGAGC<br>TGTTGACAATTAATCATCCGGCTCGTATAATGTGTGGAATTGTG<br><i>P<sub>irc</sub></i> |
| <i>P<sub>nifH</sub></i> | AGCGGATAACAATTCACACAGGAAACAGCGCCGCTGAGAAA<br>AAGCGAAGCGGCACTGCTCTTTAACAATTTATCAGACAATCTG<br>TGTGGGCACTCGACCGGAAT<br>TTCTCCAACCTCAATGATCATCATGGCCGGGCTCGTCCCGGCC<br>ATTCACGTTCTTGCTCCGGGCTCTGCCGTAGTCGTGGATGCCCG                                                                                                                                                                                                                                                                                                                                                                                                                                                                                                                                                                                                                                                                                                                                                                                                                         |

---

GCACAAGGCCGGGCATGACGATGCGTGCACTCGCTATCCTCGT  
GATTGCGGGGAGCCTAATCCAGGATCCCCATGCACCGGGCCTT  
GGATTGCGTCGCTTCGCACGCAATGACGCAGCGCAGTCGATCT  
CAAGTTGCGACAGAGTCTCGCTTAGCTCCCCGGCCGGTATCAG  
TTTGTTTCGTTTCTAACAGCCGTTCCCTGGGATGTCGTCCGCTC  
GGCAGCGATGTCCGATTCTAAACATCTACGTACATTCTGCCCG  
GACATTCTACATCTCCGCGAAAACACACACTTTTTTCGTCTCCGG  
CGACGCTTGGCACGCTCGTTGCAAACAGGGATCAGCAAGGCC  
AGGGATGGTTGGCCGAGCAGGTACTGCAAAGGGCAACGTCCG  
CATCTGAGCCGTGCGACGGTTTTGAACGGAAGAAGGCTGCGCC  
TCGGCGCAAATCGATCAAGCGGCATTAGGTCAACGGAGAG

*P<sub>pckA</sub>*

GATCTGACCGGCGCAGAGGCGCTGCTCGAGGTCGAGGCTTCGG  
CGGTCGAGCACATCAATGCCGATCATCCAGATAACAATGAAGTT  
GTACGCCACTCAGCTACTCGGCTCTGGCGAAGCCGACTGGCGC  
TGACCGGCATCGATCCGGAAGGGCTGGATCTGCAATGCGAGC  
GTGCGACGCTGCGGCTCGATTTTCCAAGTCGCGTGGAAAAC  
TGCTGCATTGCGGGACATGCTGAAACGCATGGCTGACATTGCC  
CGCAAACGGAATGACTTGAGCCAGCGCAATGTCGCTCGGCGG  
TAAACGAAATAATGCCGGCCGGGTTGGCAAACCCCTCGTTCGC  
CACTATTCAGTCGCCCCACTGGATCAGGGCGGTATATATTGAC  
GTTACCGCGGCCAGTGATGCGCGTTGGCGGCAATCGCGCGATC  
GAGACAACGCGGATTCGAGGAGGATCTATTC

---

**Table S4 Primers used for gene knockout**

| Primers                  | Sequence (5'-3')                                                                       |
|--------------------------|----------------------------------------------------------------------------------------|
| $\Delta crtC$ -up-F:     | AAATCTAGAAGATCGCCGCTCCCTTCGAT                                                          |
| $\Delta crtC$ -up-R:     | GGCTACGCCTGGTGGTACATTCTGAAGACACTCCGTTCTAC                                              |
| $\Delta crtC$ -down-F:   | GTAGAACGGAGTGTCTTCGAATGTACCACCAGGCGTAGCC                                               |
| $\Delta crtC$ -down-R:   | 5-TTG <u>TCTAGA</u> ATGACCTGGAGCATGGTGGC-3                                             |
| $\Delta crtC$ -yz-F      | GCAACGGCGTTAGTTGTGGC                                                                   |
| $\Delta crtC$ -yz-R      | CTGCTTCCAAGACGACGTGA                                                                   |
| $\Delta crtD$ -UP-F      | GTGGATCCCCCGGGCTGCAGGCTCGTTGCCATTGGTGCAT                                               |
| $\Delta crtD$ -UP-R      | AAGCCGAGATCGGCCGAACAGACTACGACGCGATTCCCTCGC                                             |
| $\Delta crtD$ -down-F    | GCGAGGAATCGCGTTCGTAGTCTGTTCGCCGATCTCGGCTT                                              |
| $\Delta crtD$ -down-R    | TTGATATCGAATTCCTGCAGACCATCGAGCGGGCGTAGAA                                               |
| $\Delta crtD$ -yz-F      | CACGGAAGATCGTCATGGAT                                                                   |
| $\Delta crtD$ -yz-R      | ATACAACGCGACGTTGATGG                                                                   |
| $\Delta crtF$ -UP-F      | GTGGATCCCCCGGGCTGCAGTCAATCAGGCCGACATGGCC                                               |
| $\Delta crtF$ -UP-R      | CATTCTCCAACATCGCCTGCACGAGGTCGAACATCGCCAC                                               |
| $\Delta crtF$ -down-F    | GTGGCGATGTTTCGACCTCGTGCAGGCGATGTTGGAGAATG                                              |
| $\Delta crtF$ -down-R    | TTGATATCGAATTCCTGCAG AGATGCTGCGATAGTCGCGA                                              |
| $\Delta crtF$ -yz-F      | TGCGGTTCGTGATCATGTC                                                                    |
| $\Delta crtF$ -yz-R      | ATGATAAGCAGTCGCAGCCA<br>CCGGGGGATCCACTAGTTCTAGAACCGGATCCGGCAAGGAT                      |
| $\Delta RPA1208$ -up-F   | G                                                                                      |
| $\Delta RPA1208$ -up-R   | CCCCGCGTCGTATCGTAACGCTGCGAGAATCGCAGCGAC                                                |
| $\Delta RPA1208$ -down-F | GTCGCTGCGATTCTCGCAGCGTTACGATACGACGCGCGGC                                               |
| $\Delta RPA1208$ -down-R | CCGCGGTGGCGGCCGCTCTAGAGCAGTCACAGCAAGGCTCC<br>CCGGGGGATCCACTAGTTCTAGACCAACAATCCGCAGCACA |
| $\Delta PhbC$ -UP-F      | C<br>GCCAGGCCTTAGCGACGATGACCATCGGCAACGAAGCCTAC                                         |
| $\Delta PhbC$ -UP-R      | C                                                                                      |
| $\Delta PhbC$ -down-F    | GTAGGCTTCGTTGCCGATGGTCATCGTCGCTAAGGCCTGGC                                              |
| $\Delta PhbC$ -down-R    | CCGCGGTGGCGGCCGCTCTAGACCTCGACTCCGGGTAACG                                               |
| $\Delta phbC$ -yz-F      | TGCAGGTGATCGGCGGATT                                                                    |
| $\Delta phbC$ -yz-R      | CAATCGTCGCACTCGAGGAT                                                                   |
| $\Delta RPA1208$ -yz-F   | GGAACAGACCCGGTCACTACT                                                                  |
| $\Delta RPA1208$ -yz-R   | GCCCGAAGCACGACCAAGA                                                                    |

**Table S5 Primers used for real time quantitative PCR**

| Primers   | Sequences (5'-3')     |
|-----------|-----------------------|
| cbbP-F    | TAACCGCCACTTCAGCCATT  |
| cbbP-R    | TCGTCTGTAACGTAGTGACG  |
| cbbF-F    | GGCTGCTCTACGAAACCCAT  |
| cbbF-R    | GATCGTCTTGGCGGTGAGAT  |
| cbbK-F    | GTCTCTGTGCGAGAAGGACC  |
| cbbK-R    | CTCGAAGTGATAGGCCACGG  |
| cbbI-F    | CATGCTTTCGTCACCGATGG  |
| cbbI-R    | ACAACCCATGCTCGACTACG  |
| cbbJ-F    | TTGAGTCTCGCAATCGGCTC  |
| cbbJ-R    | CAGGCCGTTTCATCTTCCAGT |
| glpX-F    | ACATGGTGAAGGGTGACTGC  |
| glpX-R    | TCCGCCTTGATGTAGCGAAC  |
| RPA3384-F | CCTCGGTGATGACGACCAA   |
| RPA3384-R | ATCGACCTTGATTGGCGTGT  |
| RPA0232-F | GGAAGTGATGGTGATCGGCT  |
| RPA0233-R | ACGATGTGCTTCACCCTGAG  |
| RPA0794-F | CGTCAGCGCCAATCTGTTTC  |
| RPA0794-R | CTGGGGCGATGGAAATGGAA  |
| RPA0799-F | TCGCTAGTCTCGAATACGGC  |
| RPA0799-R | CCGCAGATCCTCCTCCTTC   |
| cbbX-F    | GATCGTGAGTTGATCGGGCT  |
| cbbX-R    | CATGTGCAAGGTGGGATTGC  |
| cbbRR1-F  | GAGATCCGTGACCGCTTCAG  |
| cbbRR1-R  | AAACCATAGATCCCGGCGAC  |
| cbbRR2-F  | GAAGAAGCTCGGGATCGAGG  |
| cbbRR2-R  | CGGCATGTGATAGTCGGTGA  |
| cbbSR-F   | GGGCTGTTCAAGCGTTTCAG  |
| cbbSR-R   | GCTGGCTGTCGATCTTGAGT  |
| cbbX-F    | GATCGTGAGTTGATCGGGCT  |
| cbbX-R    | CATGTGCAAGGTGGGATTGC  |
| cbbR-F    | AGCCTGATGGAGCAGTTCTT  |
| cbbR-R    | ACGGTGTGGGCCGAAATAAA  |
| cbbL-F    | AGTATCGCGCCAAGTGCTAC  |
| cbbL-R    | ATGATCGACGCGGTGAGATT  |
| cbbS-F    | GACTGACCCAAGGCTGTTTCT |
| cbbS-R    | AATAAGTGTTGCGGGGATGC  |
| cbbA-F    | AAATCGTGCGTGGCATCAAG  |
| cbbA-R    | TCGAACTCCGCCTTGTTCTG  |
| cbbT1-F   | TCCTACCTGCACTACGGCAT  |
| cbbT1-R   | AGTCGTGGGTCATCACATGG  |
| cbbG-F    | GAAGGCCACCACCAAGGAAG  |
| cbbG-R    | CATGTGGAAGGTGGACGAGT  |
| cbbM-F    | TGGGTTTCGGCAAGATGGAA  |
| cbbM-R    | AGCCACTCCTGGTGGAAAGTA |
| ugpC-F    | GAAATCCGCAAGCTACAGCG  |
| ugpC-R    | ATGAACGAAGCCACGAAGGT  |
| ugpA-F    | CGCCGACGATTTTCTTCTG   |

|        |                      |
|--------|----------------------|
| ugpA-R | AGCAGGCCATCCTGATACAC |
| gpsA-F | CTGGCGGAAGGCTACTACAC |
| gpsA-R | TATTCCTCCGCCTTGAGAGG |
| glpK-F | CGGGCGATTCTGTTTCGTTC |
| glpK-R | CGACAGGTAGCAATGGTCGT |
| glpD-F | CGGATGTGGTGTGGACCTTC |
| glpD-R | CAGCTTCTCCAACGCCTCTT |
| glpR-F | AGTGTCGGCACAGACCATTC |
| glpR-R | GAGCAGCCGTTGGGAATCT  |
| cbbE-F | AGCGCCGTTCAGAAGATCAA |
| cbbE-R | TGGCCTTATACGCTTCCAGC |

---



**Table S6 OD<sub>660</sub> and generation time of *R. palustris* LMJ01 using different seed culture**

| Strain | Seed culture source                                                                                       | Carbon source and electron donor |                                                    | OD <sub>660</sub> | Generation time (h) |
|--------|-----------------------------------------------------------------------------------------------------------|----------------------------------|----------------------------------------------------|-------------------|---------------------|
|        |                                                                                                           | CO <sub>2</sub> (mM)             | Na <sub>2</sub> S <sub>2</sub> O <sub>3</sub> (mM) |                   |                     |
| LMJ01  | Bacteria culture medium with 20 mM CO <sub>2</sub> and 4 mM Na <sub>2</sub> S <sub>2</sub> O <sub>3</sub> | 20                               | 4                                                  | 0.43±0.05         | 36.25±0.47          |
| LMJ01  | Frozen stock solution with 25% glycerol                                                                   | 20                               | 4                                                  | 2.35±0.14         | 20.99±0.41          |

**Table S7 Generation time of *R. palustris* with thiosulfate of different concentration as electron donor**

| Strain | Carbon source/electron donor |                                                    |               | Generation time (h) |
|--------|------------------------------|----------------------------------------------------|---------------|---------------------|
|        | CO <sub>2</sub> (mM)         | Na <sub>2</sub> S <sub>2</sub> O <sub>3</sub> (mM) | Glycerol (mM) |                     |
| LMJ01  | 20                           | 0                                                  | 0             | -                   |
| LMJ01  | 20                           | 2                                                  | 0             | 31.01±0.25          |
| LMJ01  | 20                           | 4                                                  | 0             | 36.25±0.47          |
| LMJ01  | 20                           | 6                                                  | 0             | 36.50±0.24          |
| LMJ01  | 20                           | 8                                                  | 0             | 35.60±0.16          |
| LMJ01  | 20                           | 0                                                  | 20            | 28.00±0.33          |
| LMJ01  | 20                           | 2                                                  | 20            | 22.83±0.32          |
| LMJ01  | 20                           | 4                                                  | 20            | 21.57±0.31          |
| LMJ01  | 20                           | 6                                                  | 20            | 25.67±0.22          |
| LMJ01  | 20                           | 8                                                  | 20            | 25.02±0.28          |

**Table S8 Predicated genes encoding HCO<sub>3</sub><sup>-</sup> transporter**

| Gene name                 | Locus Tag   | Protein function                                                      | Homologous gene in cyanobacteria | %ID  |
|---------------------------|-------------|-----------------------------------------------------------------------|----------------------------------|------|
| <i>sulP</i> <sup>a</sup>  | RPA432<br>6 | sulfate transporter family protein                                    | <i>bicA</i>                      | 45   |
| -                         | RPA338<br>3 | taurine transport system permease                                     | <i>cmpB</i>                      | 24.8 |
| -                         | RPA338<br>4 | nitrate/sulfonate/bicarbonate ABC related periplasmic binding protein | <i>cmpA</i>                      | 35.7 |
| <i>nrtC2</i> <sup>a</sup> | RPA338<br>5 | nitrate transport system ATP-binding protein                          | <i>cmpD</i>                      | 39.8 |
| <i>nrtA</i> <sup>a</sup>  | RPA211<br>2 | nitrate transporter component nrtA                                    | <i>cmpA</i>                      | 50   |
| <i>nrtB</i> <sup>a</sup>  | RPA211<br>3 | nitrate transport system permease                                     | <i>cmpB</i>                      | 47.1 |
| <i>nrtC1</i> <sup>a</sup> | RPA211<br>4 | nitrate transport system ATP-binding protein                          | <i>cmpD</i>                      | 49.4 |
| -                         | RPA370<br>7 | nitrate transporter component nrtA                                    | <i>cmpA</i>                      | 50   |

<sup>a</sup> Gene name was computationally analyzed.

**Table S9 Predicated genes encoding carbonic dehydratase**

| Gene name                | Locus Tag | Protein function      | Homologous gene in cyanobacteria | %ID  |
|--------------------------|-----------|-----------------------|----------------------------------|------|
| -                        | RPA0232   | carbonate dehydratase | <i>ecaA</i>                      | 50   |
| <i>acaP</i> <sup>a</sup> | RPA0794   | carbonate dehydratase | <i>ecaA</i>                      | 42.3 |
| -                        | RPA0799   | carbonic anhydrase    | <i>ecaA</i>                      | 63.2 |

<sup>a</sup> Gene name was computationally analyzed.

Figure S1 Linear fitting relationship between OD<sub>660</sub> and biomass

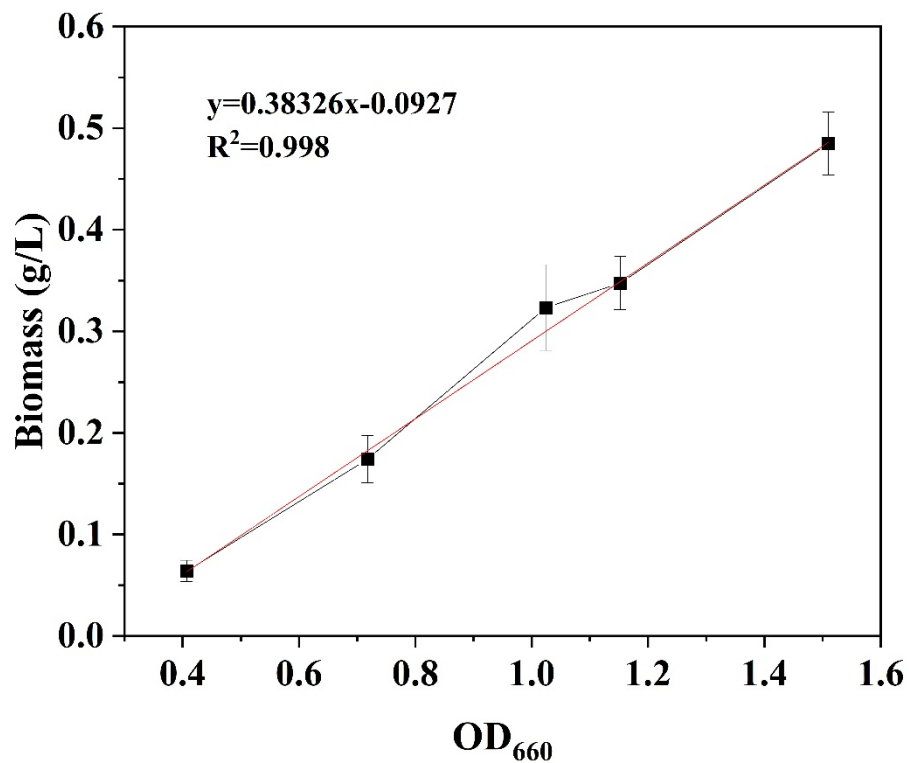

Figure S2 Analysis of lycopene standard and extracted lycopene.

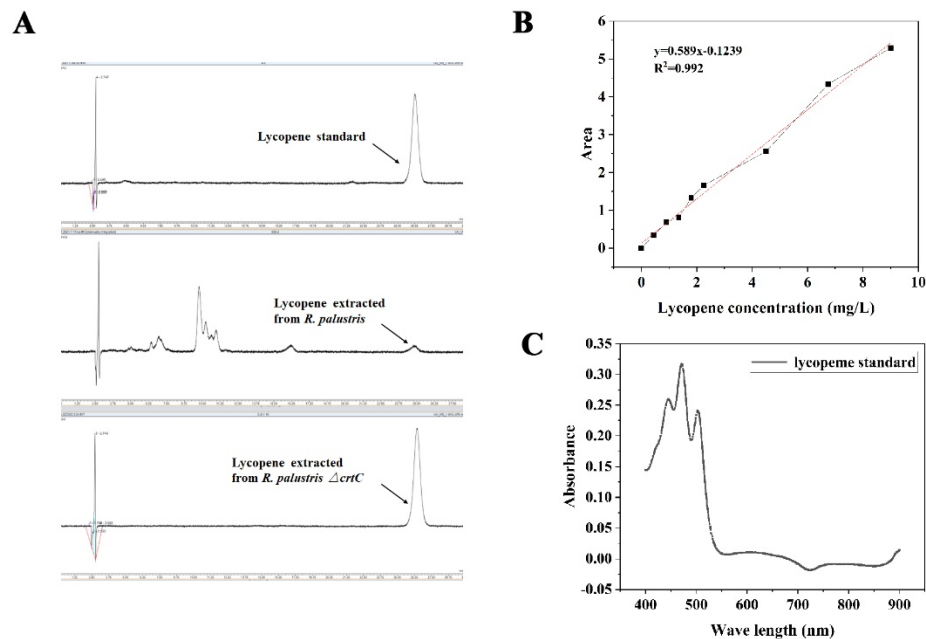

**A.** HPLC spectrum; **B.** Standard curve of lycopene standard, which was corrected by the percentage of actual lycopene (45%) in the standard, using HPLC; **C.** UV-visible absorption spectrum (400-900 nm) of lycopene standard.

**Figure S3 Color change of *R. palustris* with *crtC*, *crtD* or *crtF* deletion**

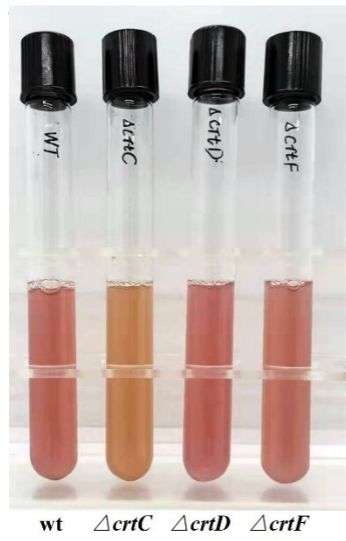

Figure S4 Promoter screening by detection of GFP fluorescence intensity.

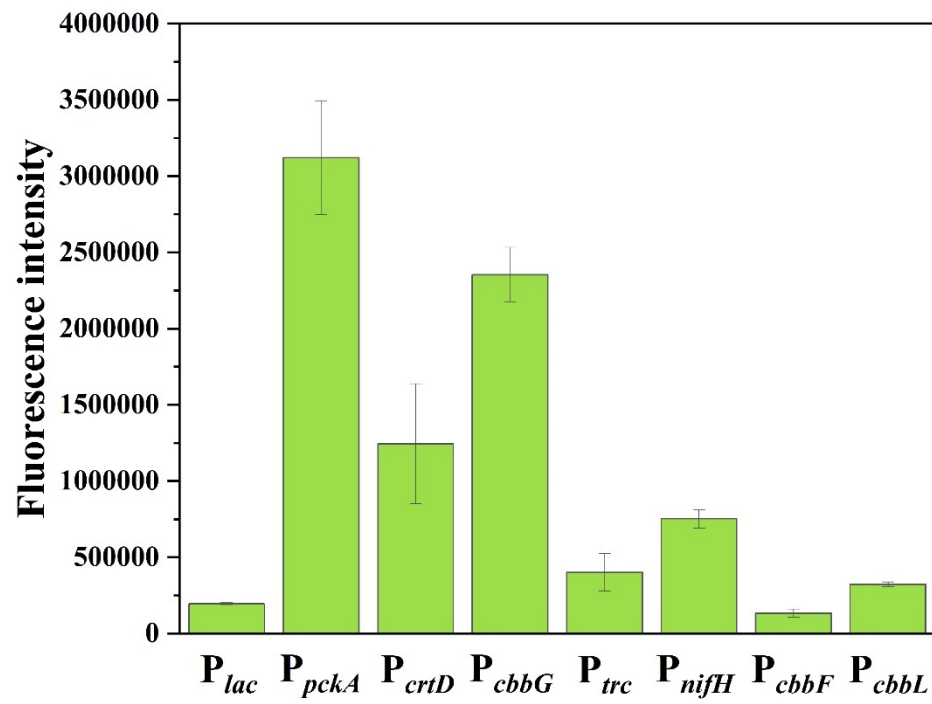

**Figure S5 Growth curve of *R. palustris* LMJ01 using  $\text{Na}_2\text{S}_2\text{O}_3$  of different concentration as electron donor**

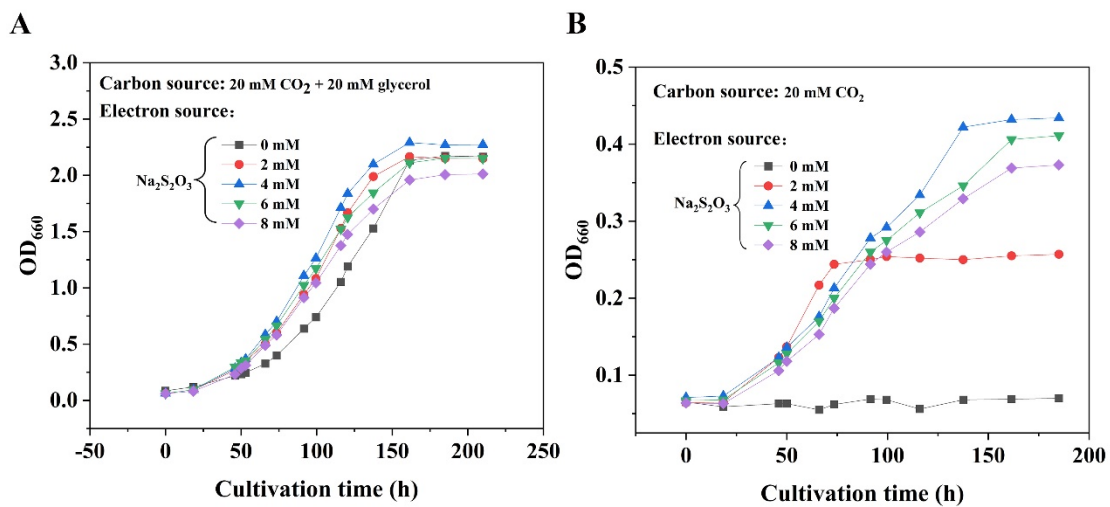

$\text{Na}_2\text{S}_2\text{O}_3$  of different concentration (0, 2, 4, 6, 8 mM) was utilized as the electron donor, using 20 mM  $\text{CO}_2$  with glycerol of 0 mM (**B**) and 20 mM (**A**) as the carbon source. Three biological replicates were performed.

**Figure S6 Arrangement of genes related to CBB cycle in the genome of *R. palustris***

Arrangement of genes related to CBB cycle directly in the genome of *R. palustris*

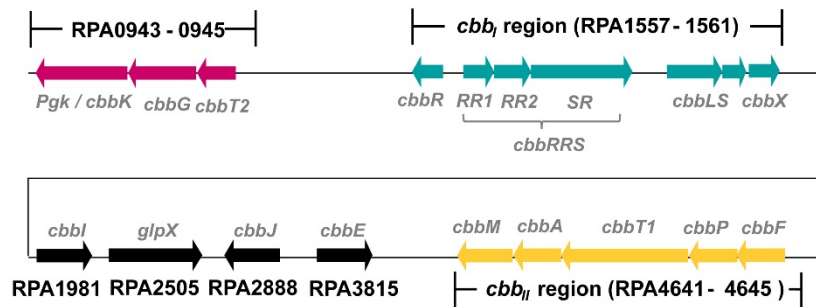

Arrangement of predicated genes encoding  $\text{HCO}_3^-$  transporter in the genome of *R. palustris*.

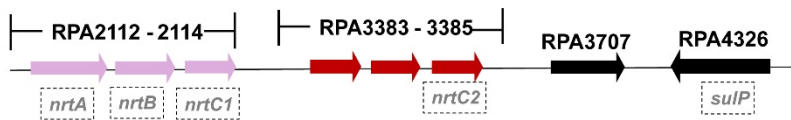

Arrangement of predicated genes encoding carbonic dehydratase/ anhydrase in the genome of *R. palustris*

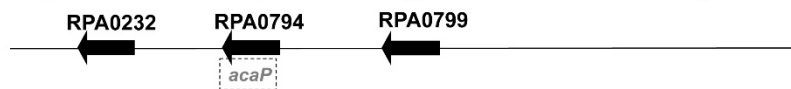

In *R. palustris*, most genes required for a functional CBB cycle are organized into two operons, *cbb<sub>I</sub>* and *cbb<sub>II</sub>*. The *cbb<sub>I</sub>* operon contains the *cbbLS* genes encoding the large and small subunits of form I RubisCO which is regulated by a LysR transcriptional activator. In *cbb<sub>II</sub>* operon, *cbbM* encodes the form II RubisCO, and *cbbA*, *cbbT1*, *cbbP* and *cbbF* are known to be present in this region. The other three genes related to the CBB cycle, *cbbK*, *cbbG* and *cbbT2*, were clustered together, and other four genes related to CBB cycle, *cbbI*, *glpX*, *cbbJ* and *cbbE*, were scattered in the genome. The putative genes encoding  $\text{HCO}_3^-$  transporter and carbonic anhydrase/dehydratase were also listed.

**Figure S7 Illustration of the process of bicarbonate entered into the CBB cycle in**

*R. palustris*

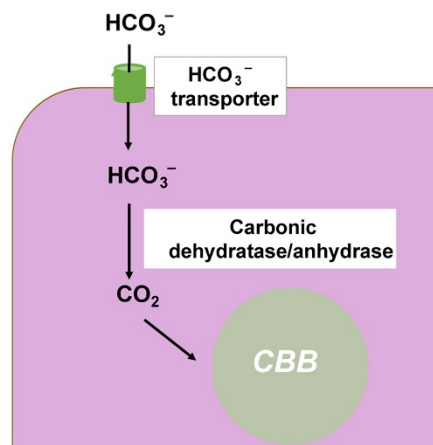

The bicarbonate ( $\text{HCO}_3^-$ ) in the medium is transported into the cytoplasm by bicarbonate transporter; and, subsequently, the  $\text{HCO}_3^-$  is converted to  $\text{CO}_2$  by carbonic anhydrase/dehydratase.
