# Supplementary material for: Enhanced CO2 capture for photosynthetic lycopene production in engineered Rhodopseudomonas palustris, a purple nonsulfur bacterium
Source: Royal Society of Chemistry journal article supplement (doi:10.1039/d2gc02467e), 2022-01-01
Supplement: d2gc02467e2.xlsx [file d2gc02467e2.xlsx]

## Sheet: RPLMJ
SNP
Mutate site	Mutate type	Reference base<->RPLMJ base	Reference codon<->RPLMJ codon	Reference aa<->RPLMJ aa	Gene name	Gene ID	Gene product
NC_005296.1_2956554	intergenic	T<->C	--	--	gyrA	TX73_RS13250	--
NC_005296.1_56088	nonsyn	T<->G	GTG<->GGG	V<->G	rpoN	TX73_RS00260	RNA polymerase factor sigma-54
NC_005296.1_720494	nonsyn	A<->C	CAC<->CCC	H<->P	aliB	TX73_RS03370	cyclohexanecarboxyl-CoA dehydrogenase
"Mutate site" means the site of the mutated base in the reference genome NC_005296.1.
"<->" means mutated to.
"aa" means amino acid.
InDel
InDel type	InDel Base	Reference genome	Reference start	Reference end	Gene distance	Gene start	Gene end	Gene ID
Insertion	G	NC_005296.1	304136	304136	11	302683	304125	TX73_RS01430
Insertion	C	NC_005296.1	598351	598351	54	597245	598297	TX73_RS02775
Insertion	T	NC_005296.1	2404283	2404283	106	2403023	2404177	TX73_RS10895
Insertion	CAA	NC_005296.1	2835831	2835831	40	2833995	2835791	TX73_RS12705
Insertion	A	NC_005296.1	3704698	3704698	38	3703437	3704660	TX73_RS16755
Deletion	AGA	NC_005296.1	4723430	4723433	47	4723009	4723383	TX73_RS21325
Insertion	TCG	NC_005296.1	4723461	4723461	78	4723009	4723383	TX73_RS21325
Deletion	CGACGCAAGC	NC_005296.1	5015278	5015288	121	5015399	5016472	TX73_RS22695
"InDel" means insertion and deletion.
Reference start and reference end indicate the insertion or deletion site in the reference genome.
"Gene distance" means the distance of the insertion or deletion site to the closest gene.
